# Supplementary material for: Shape-controllable nanofibrous membranes with well-aligned fibers and robust mechanical properties for PM2.5 capture
Source: Royal Society of Chemistry journal article supplement (doi:10.1039/c9ra02341k), 2019-01-01
Supplement: c9ra02341k1.pdf [file c9ra02341k1.pdf]

## Supplementary Information for:

### Shape-controllable Nanofibrous Membranes with Well-aligned and Robust Mechanical Property for PM<sub>2.5</sub> Capture

Jian Chen,<sup>a ‡</sup> Zhiqiang Cheng,<sup>\*b</sup> Yafeng Yuan,<sup>b</sup> Jingjing Zhang,<sup>b</sup> Jinshan Cao<sup>\*b ‡</sup>

<sup>a</sup>Institute of Environmental Toxicology and Environmental Ecology, Institute of New Energy on Chemical Storage and Power Sources, College of Chemistry and Environmental Engineering, Yancheng Teachers University, Yancheng 224007, China.

<sup>b</sup>College of Resources and Environment, Jilin Agricultural University, Changchun 130118, China.

\*Corresponding author:

E-mail: czq5974@163.com. Tel: +86 131-8089-3579

‡Jian Chen and Jinshan Cao contributed to this work equally.

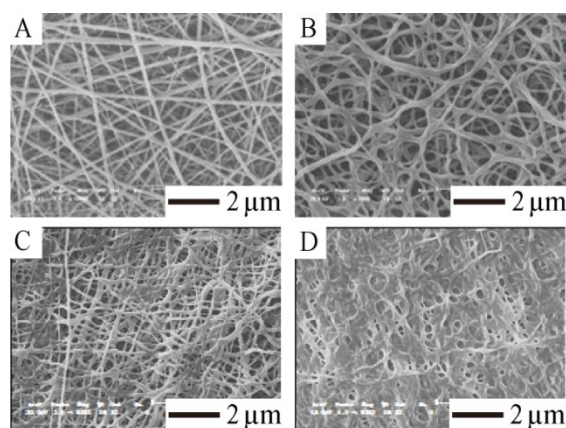

**Figure S1.** SEM images of PA66/PVB composite nanofibrous membranes heated under different temperature. (A)65°C; (B)90°C; (C)120°C; (D)160°C.

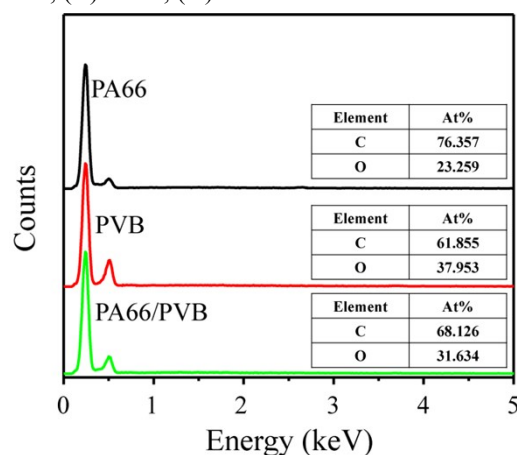

**Figure S2.** Comparison of EDS spectrum recorded of PA66, PVB and PA66/PVB nanofibrous membranes.

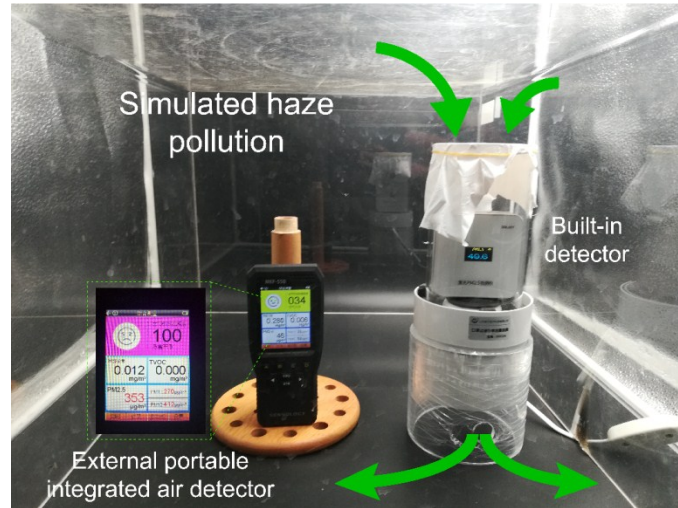

**Figure S3.** Equipment of PM<sub>2.5</sub> purification efficiency measurement under simulated haze pollution.
